# Supplementary material
Source: JCI journal article supplement (doi:10.1172/jci165826)

Full unedited gel for Figure 1A

SGLT1

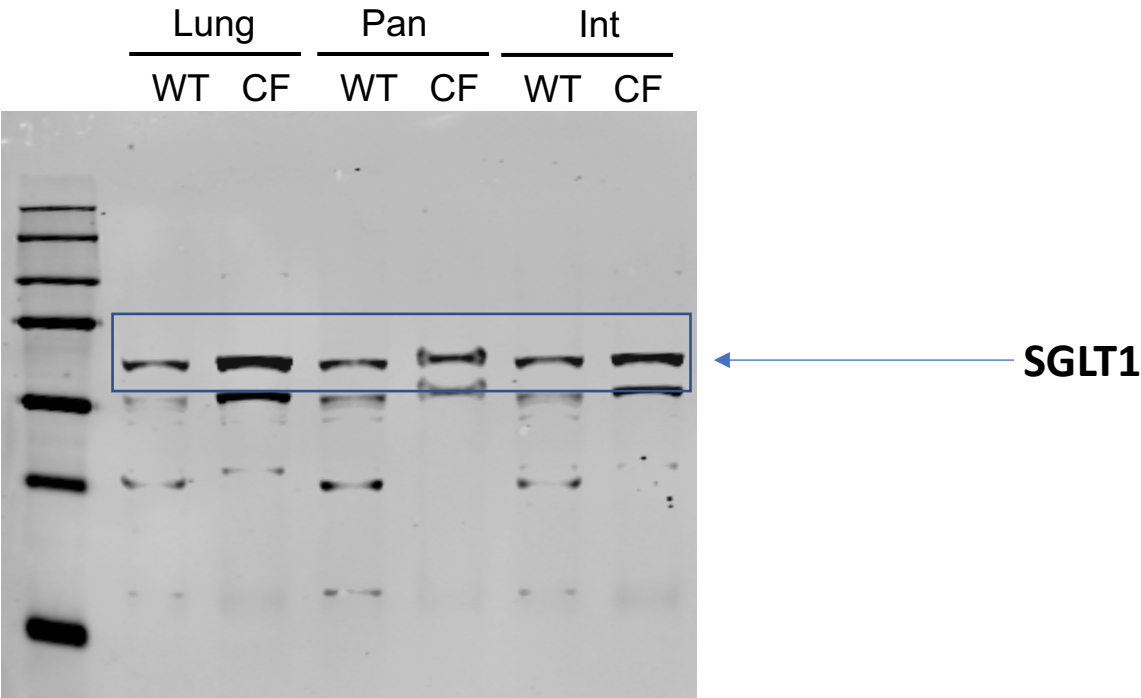

Full unedited gel for Figure 1A

$\beta$ -actin

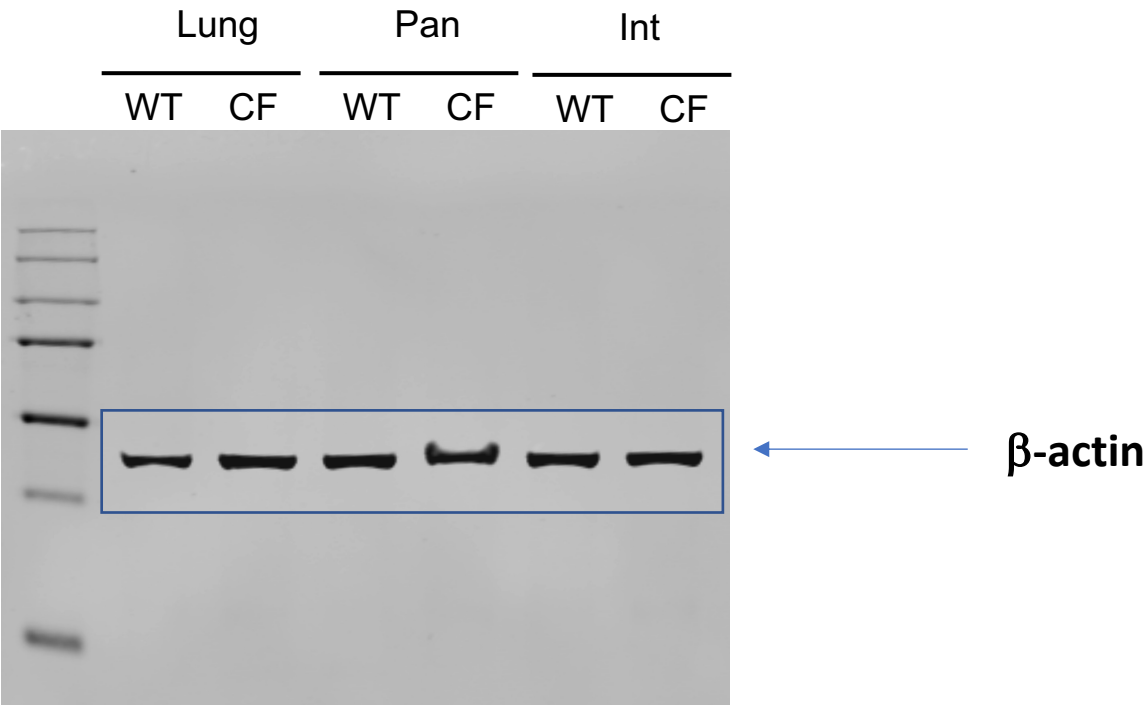

Full unedited gel for Figure 1A

CFTR

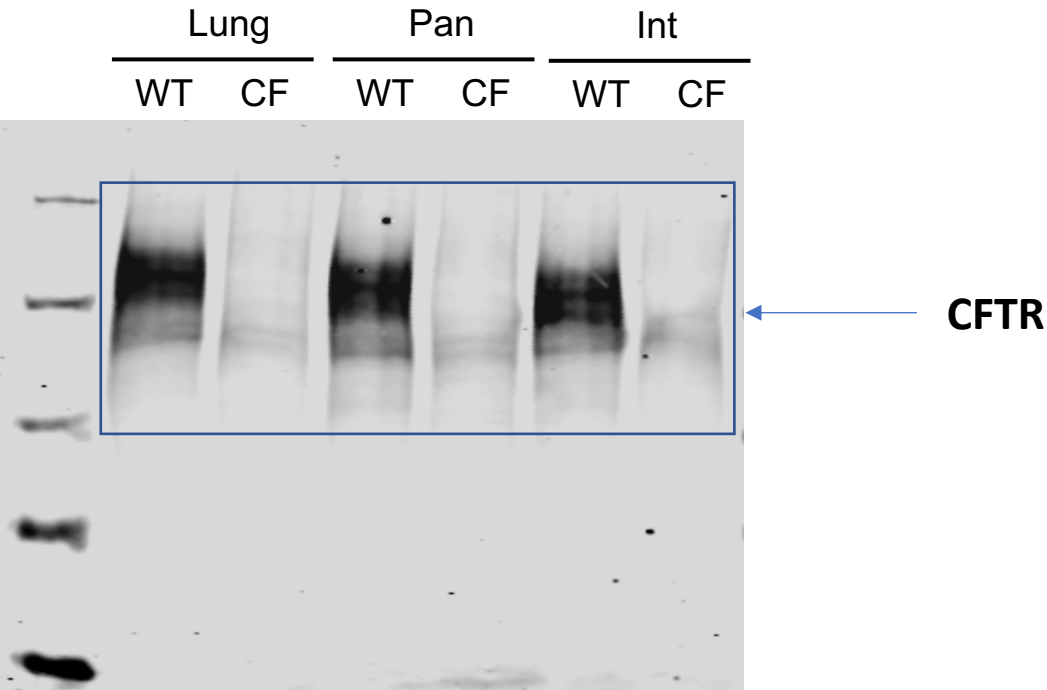

# Full unedited gel for Figure 1D

## SGLT1

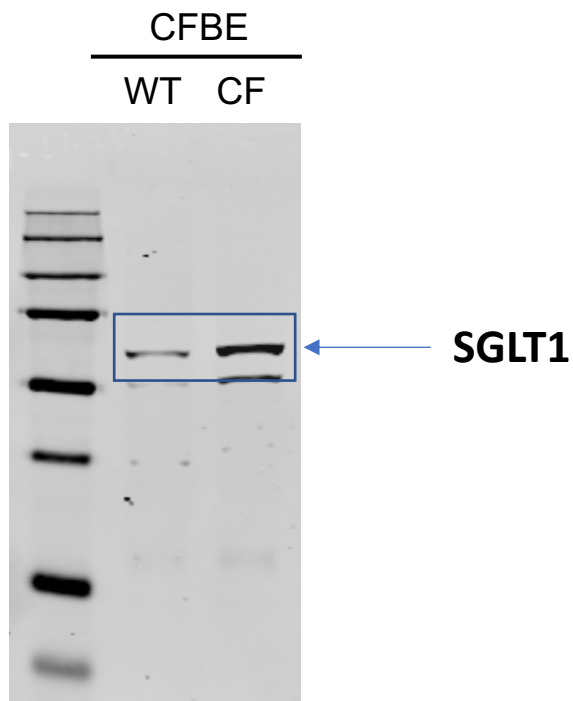

# Full unedited gel for Figure 1D

$\beta$ -actin

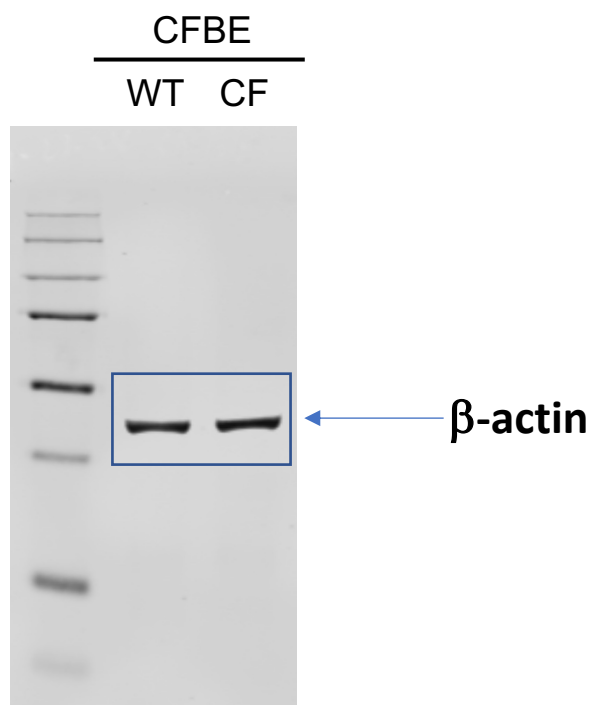

# Full unedited gel for Figure 1D

## CFTR

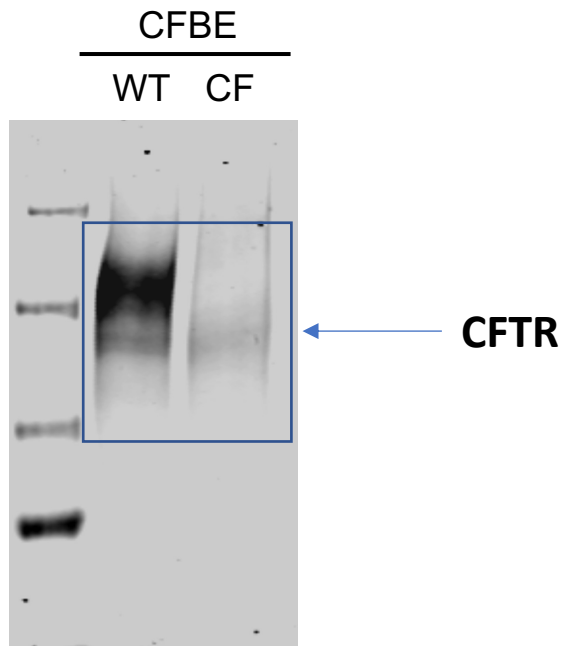

# Full unedited gel for Figure 1E

## SGLT1

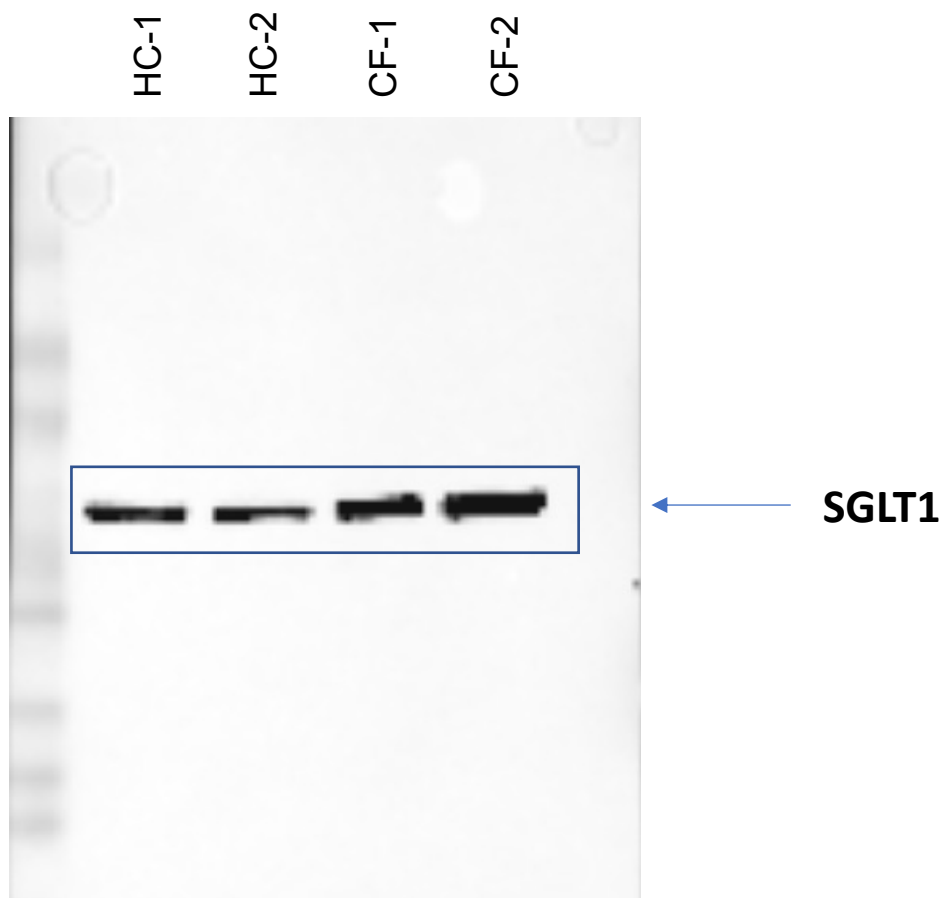

# Full unedited gel for Figure 1E

$\beta$ -actin

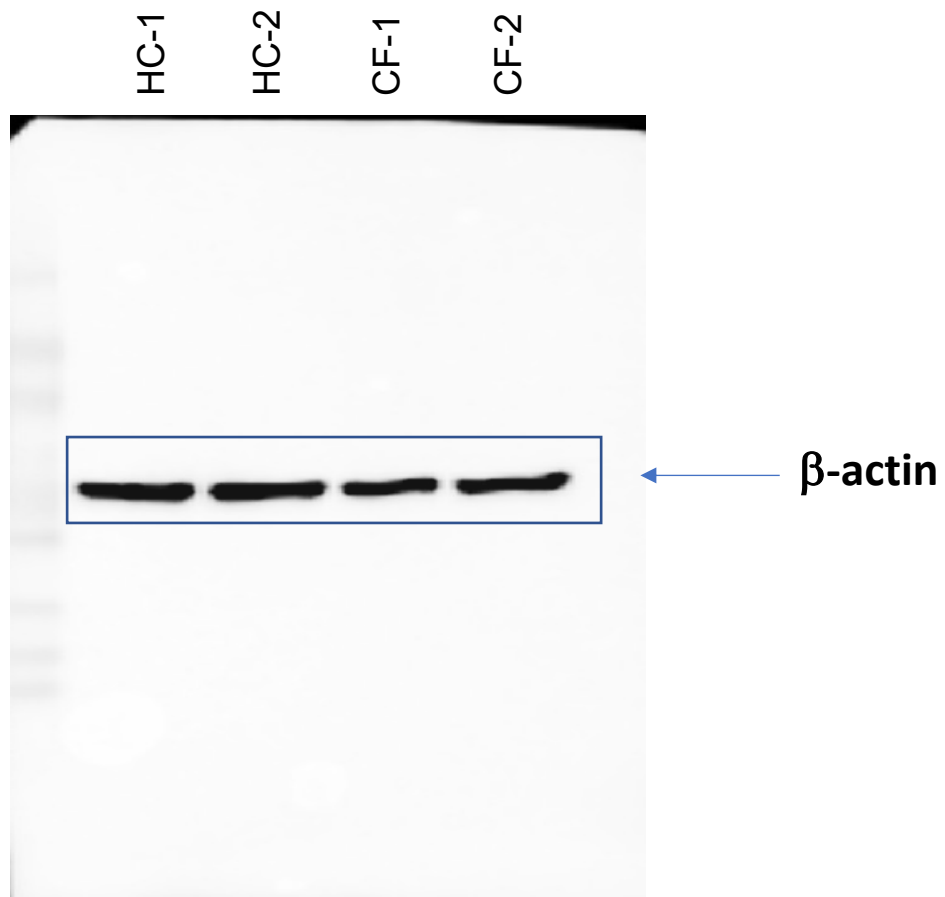



# Full unedited gel for Figure 1E

## CFTR

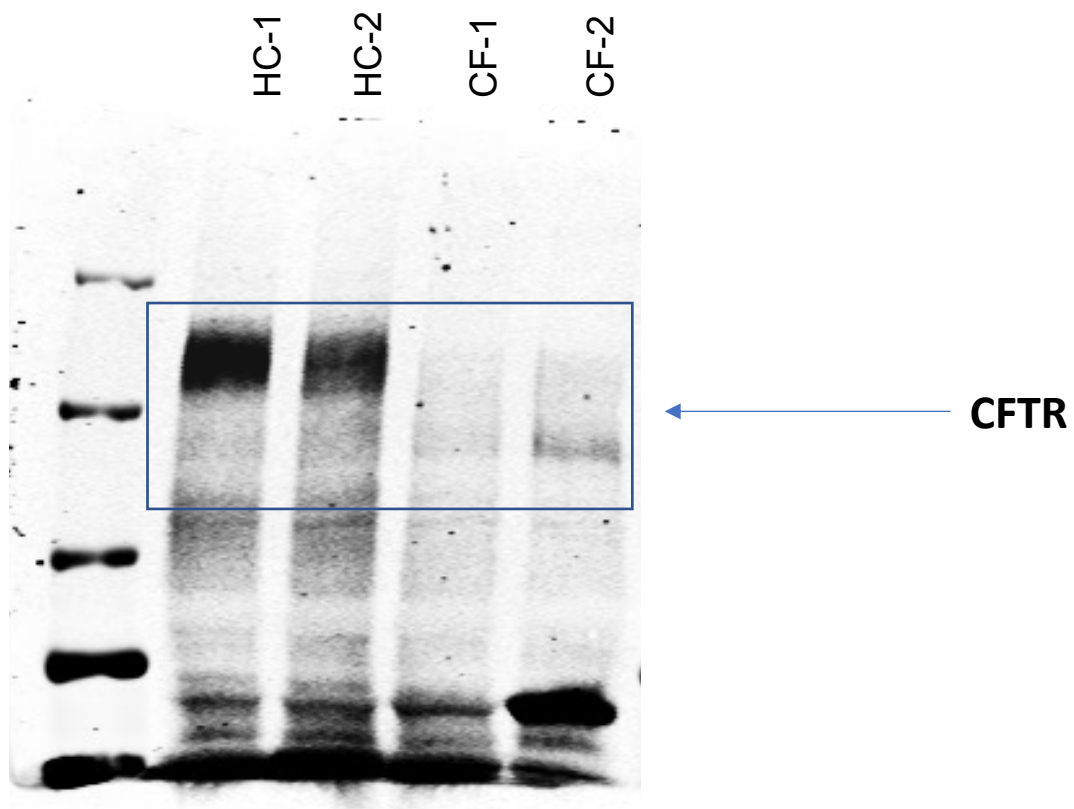

# Full unedited gel for Figure 4A

## SGLT1

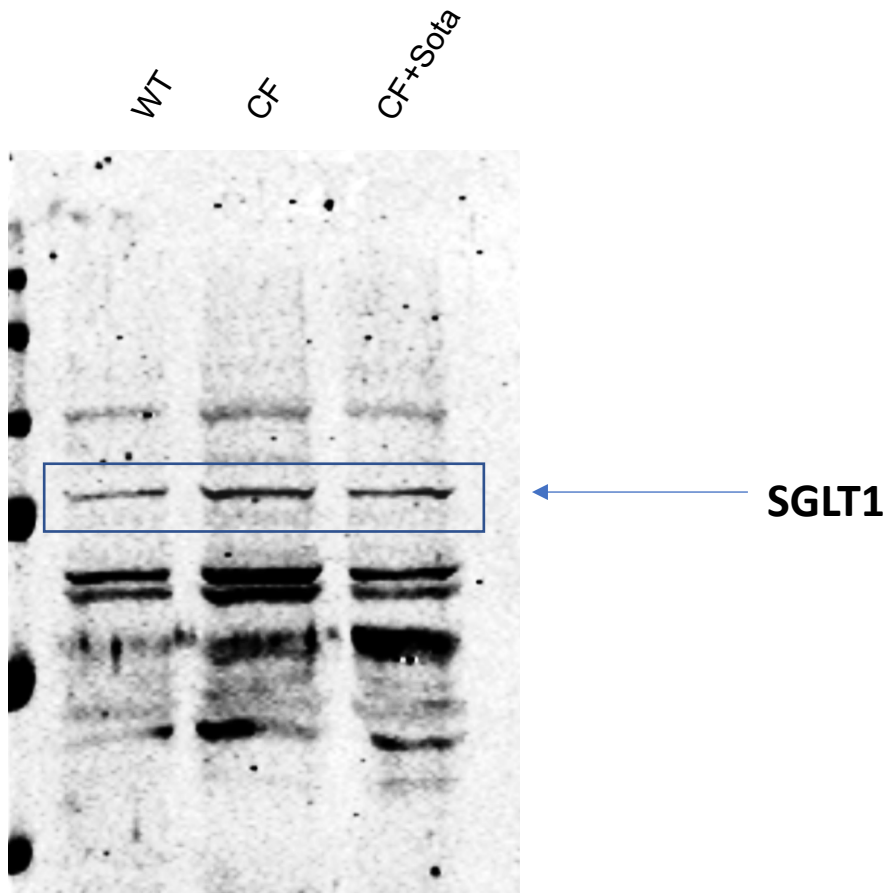

# Full unedited gel for Figure 4A

$\beta$ -actin

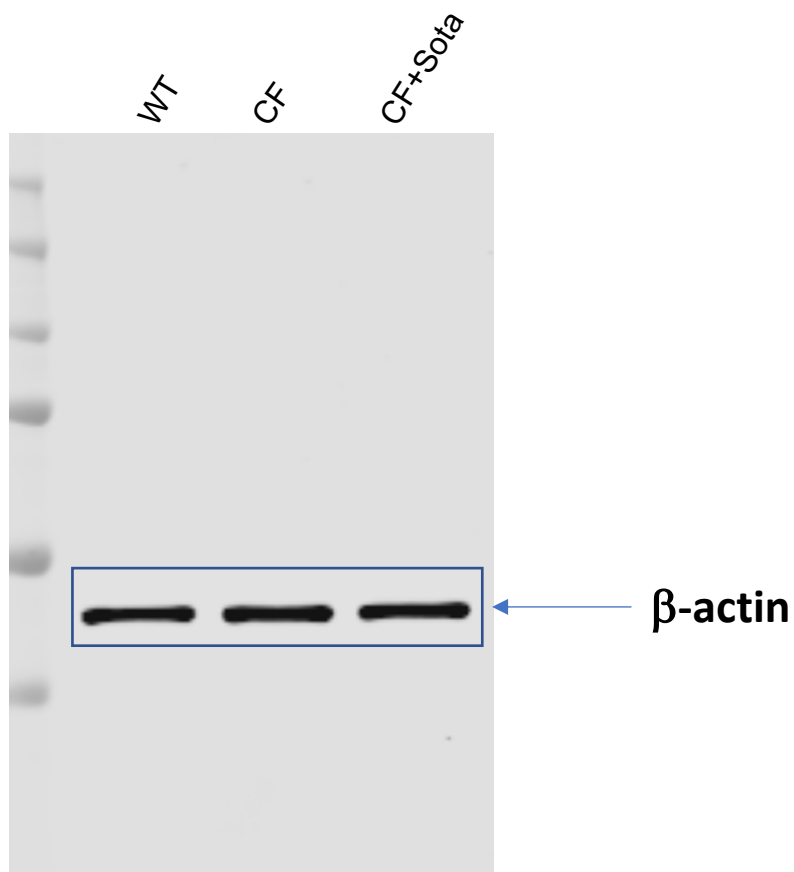

# Full unedited gel for Figure 7B

## GRP78

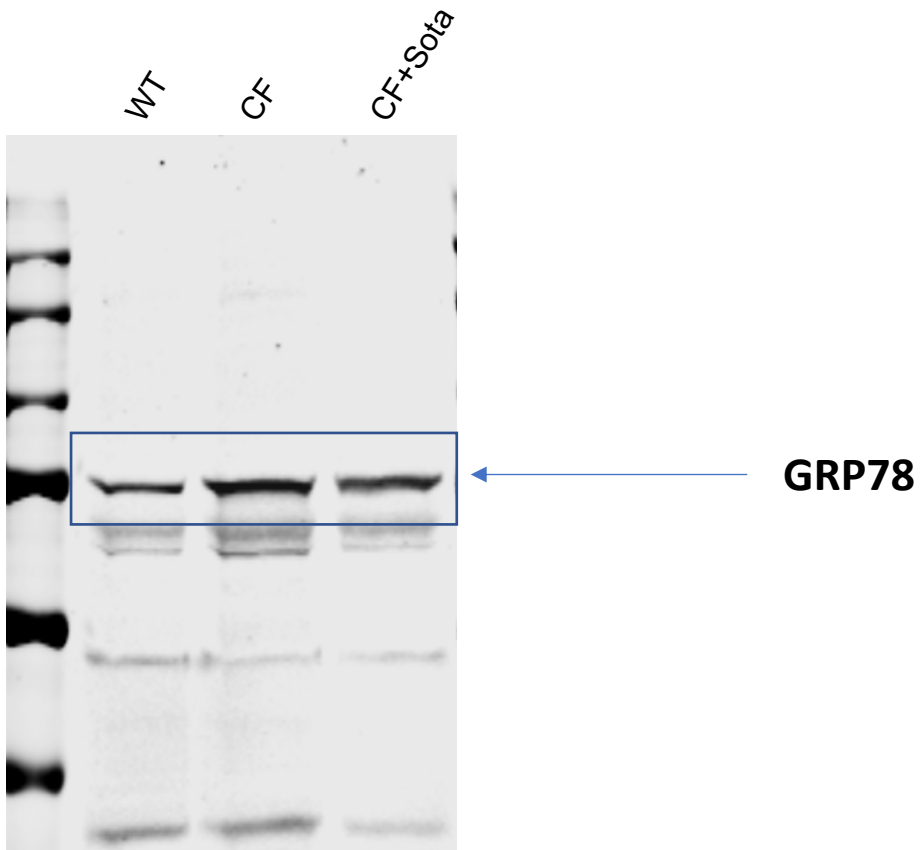

# Full unedited gel for Figure 7B

**p-IRE1 $\alpha$**

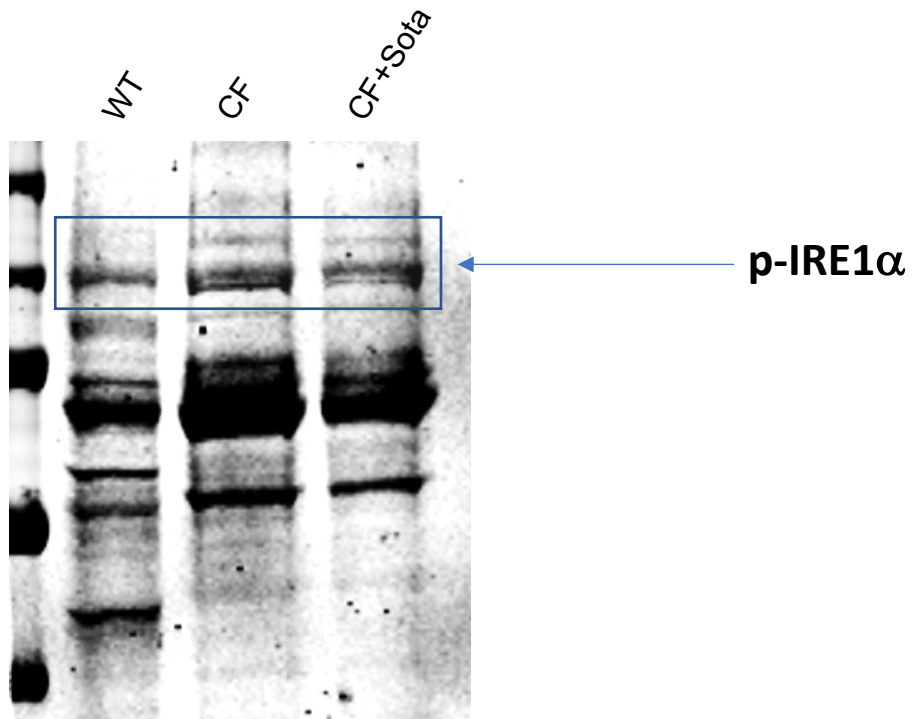

Full unedited gel for Figure 7B

IRE1 $\alpha$

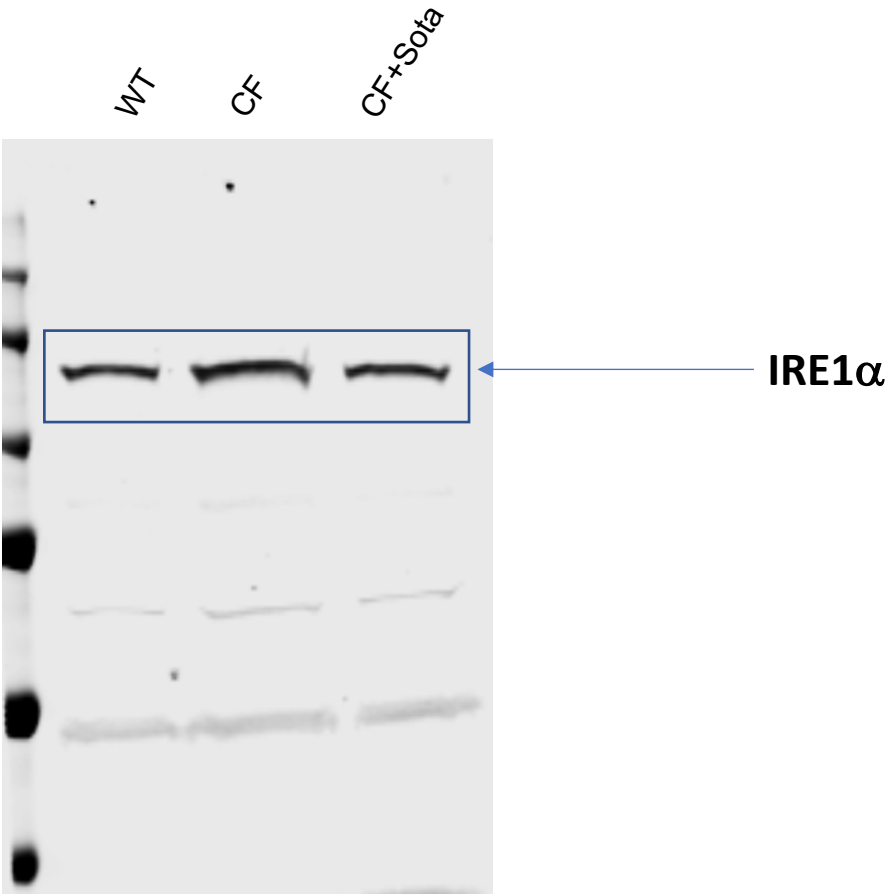

# Full unedited gel for Figure 7B

## XBP1s

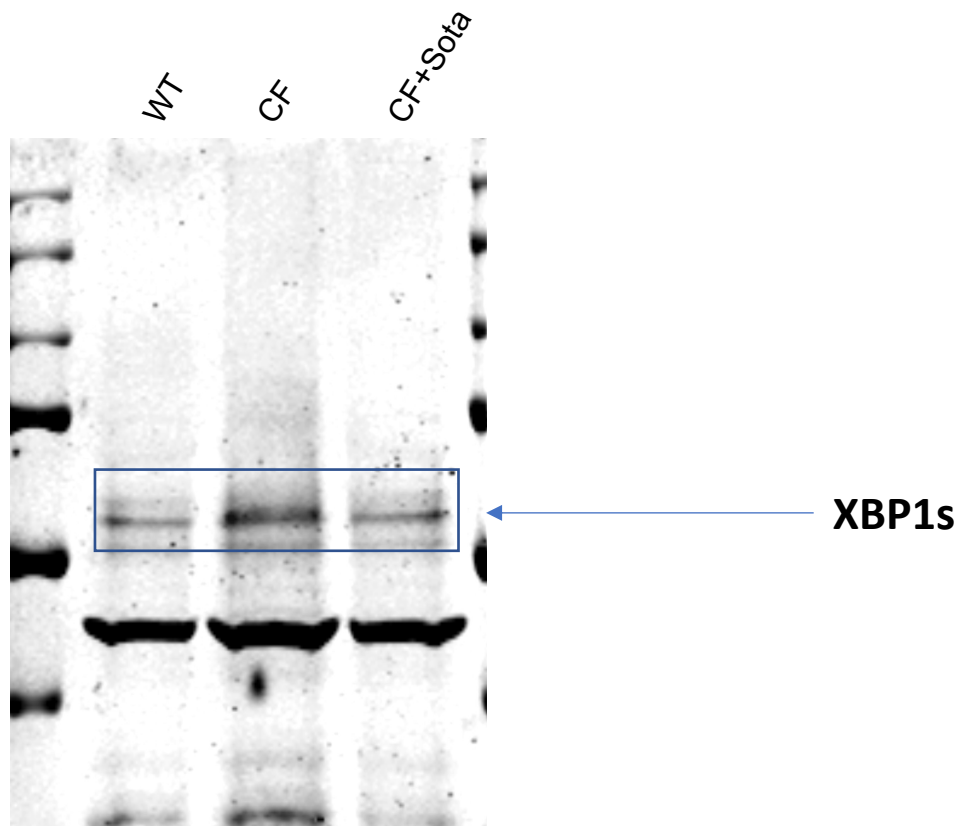

# Full unedited gel for Figure 7B

## Phos-P65 (NF $\kappa$ B)

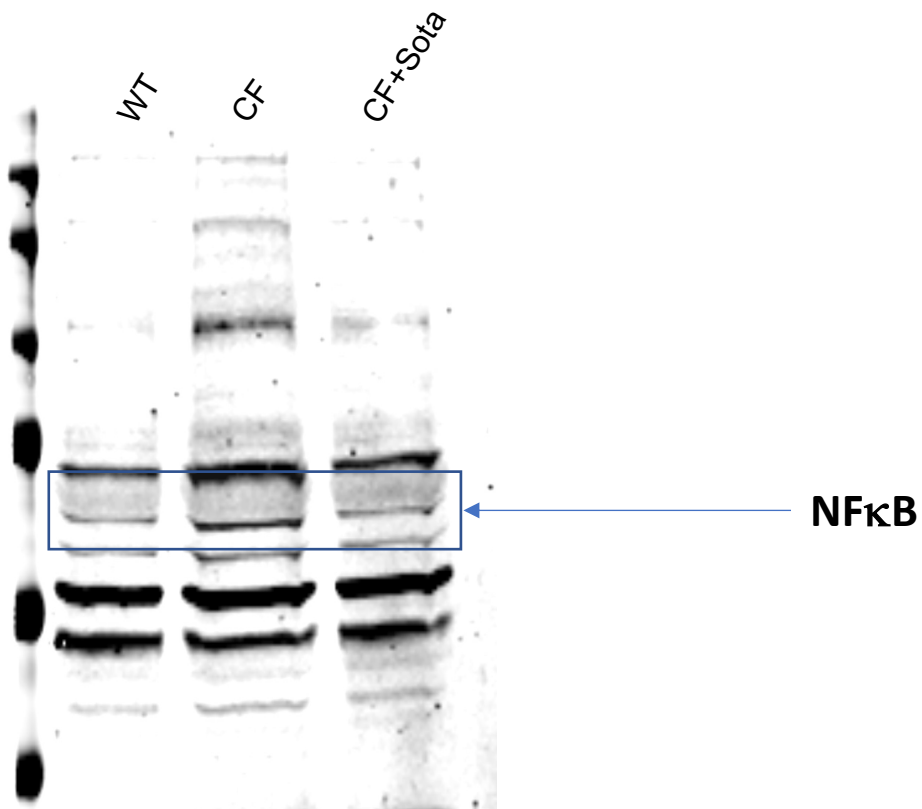



Full unedited gel for Figure 7B

$\beta$ -actin

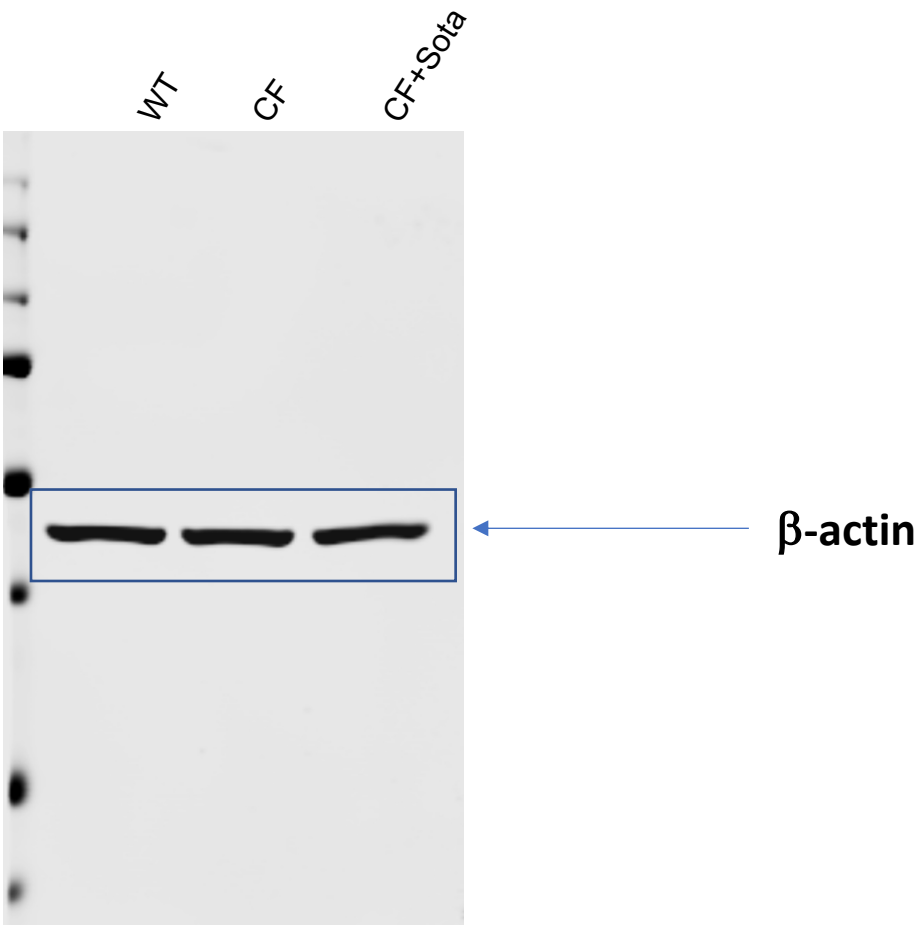

Full unedited gel for Supplementary Figure 1A

SGLT1

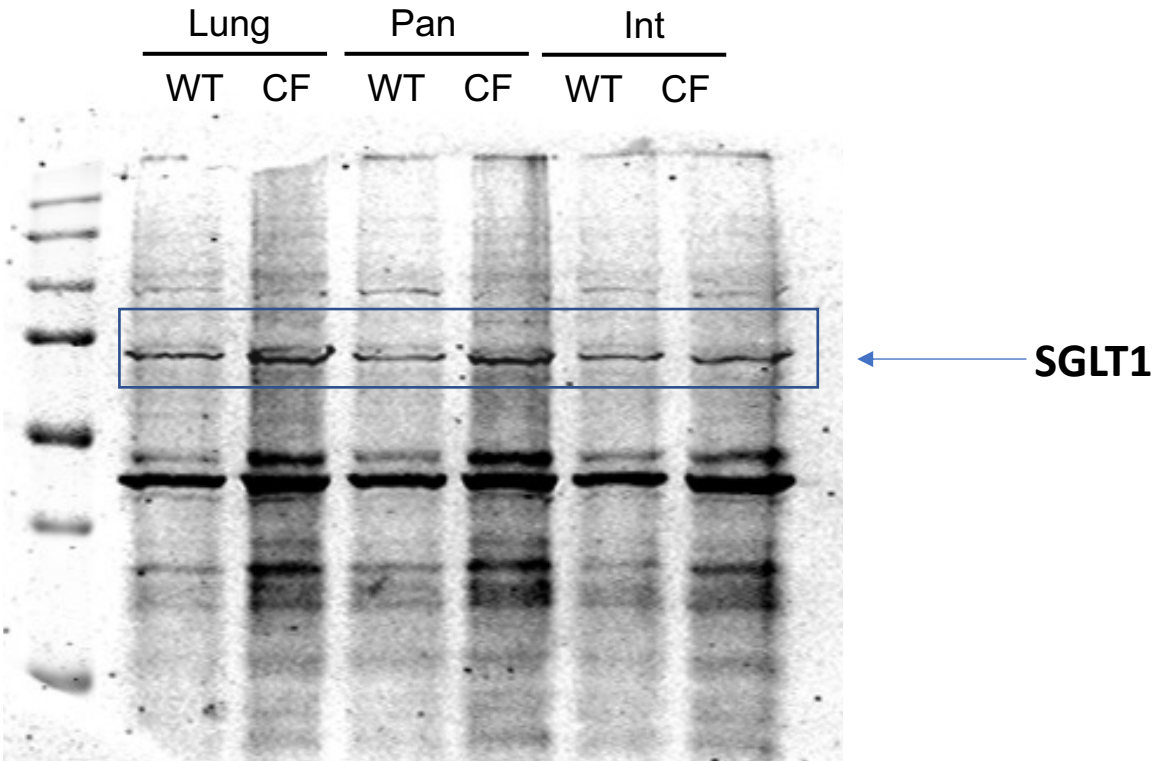

Full unedited gel for Supplementary Figure 1A

$\beta$ -actin

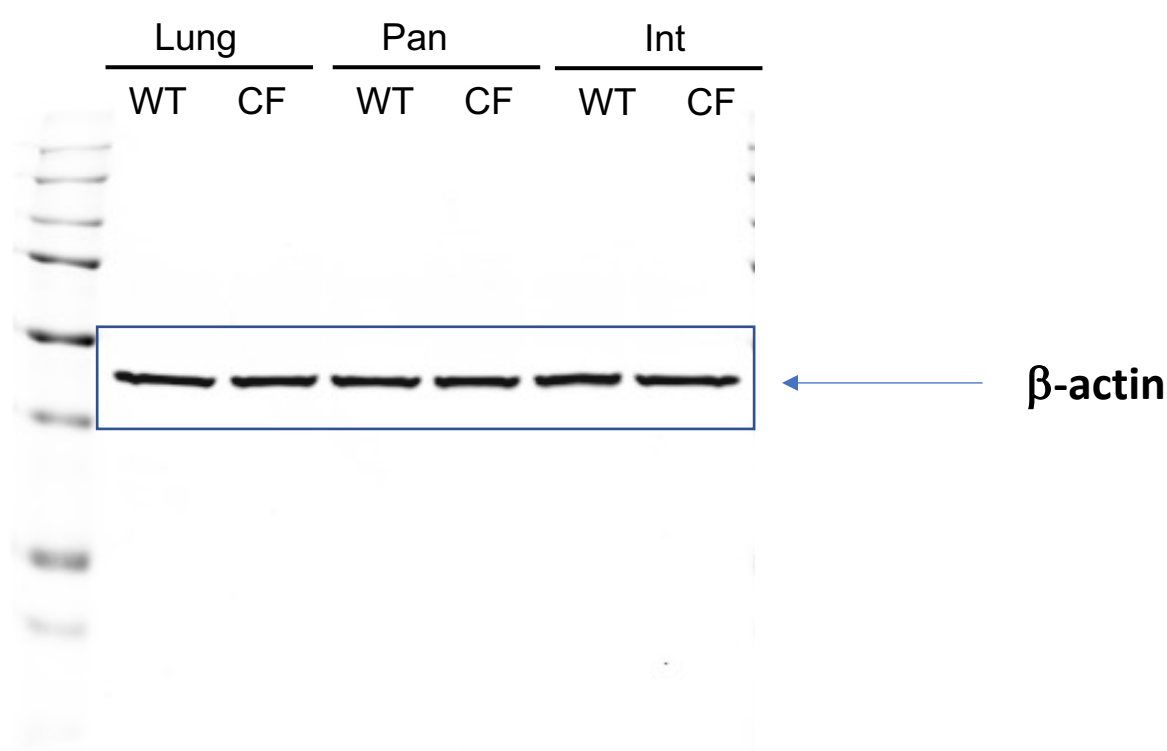

Full unedited gel for Supplementary Figure 1A

CFTR

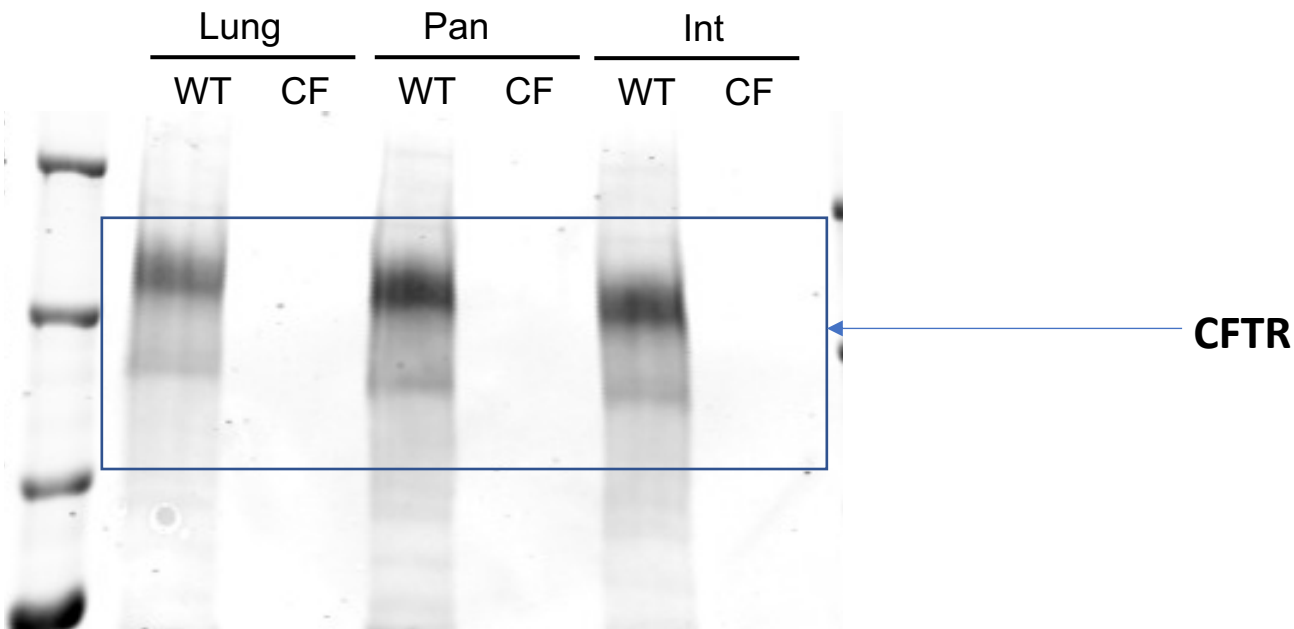

Full unedited gel for Supplementary Figure 1B

SGLT1

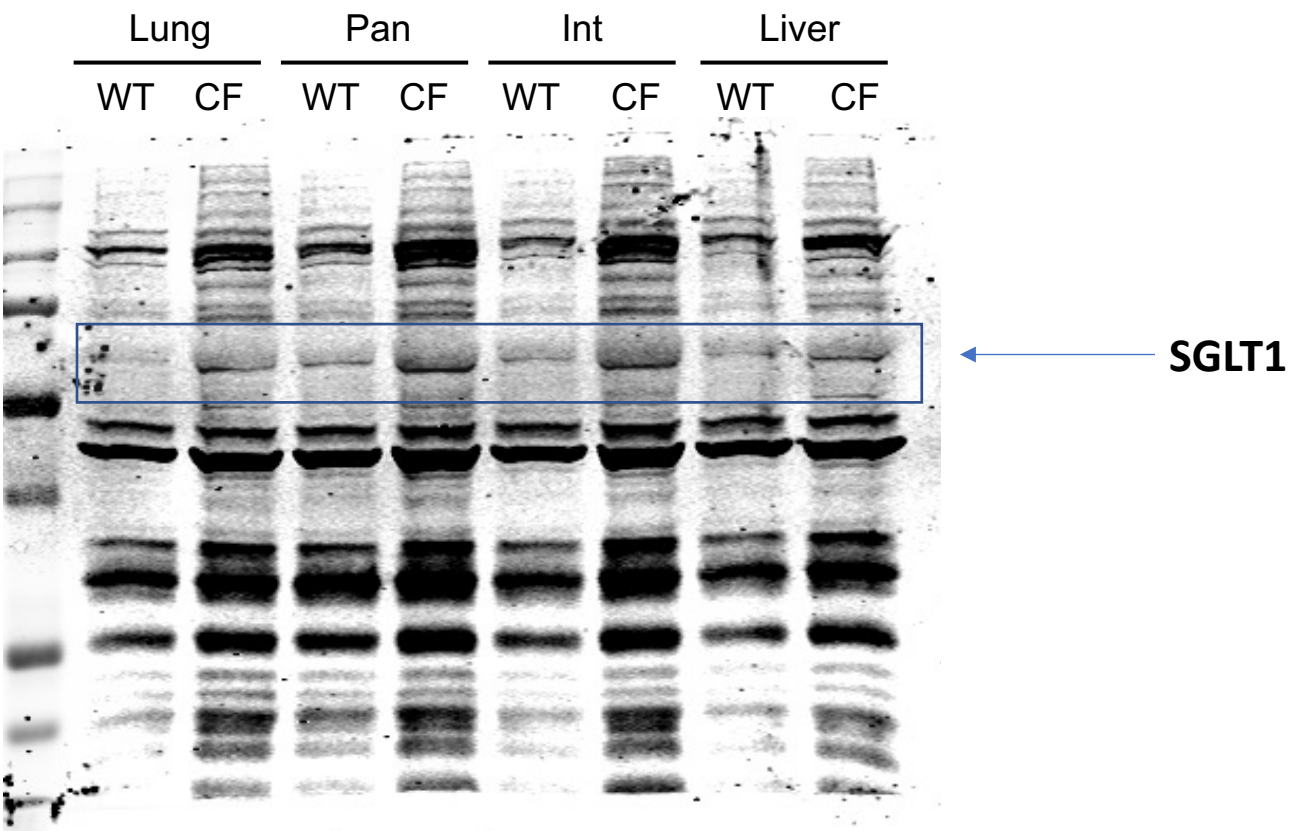

Full unedited gel for Supplementary Figure 1B

$\beta$ -actin

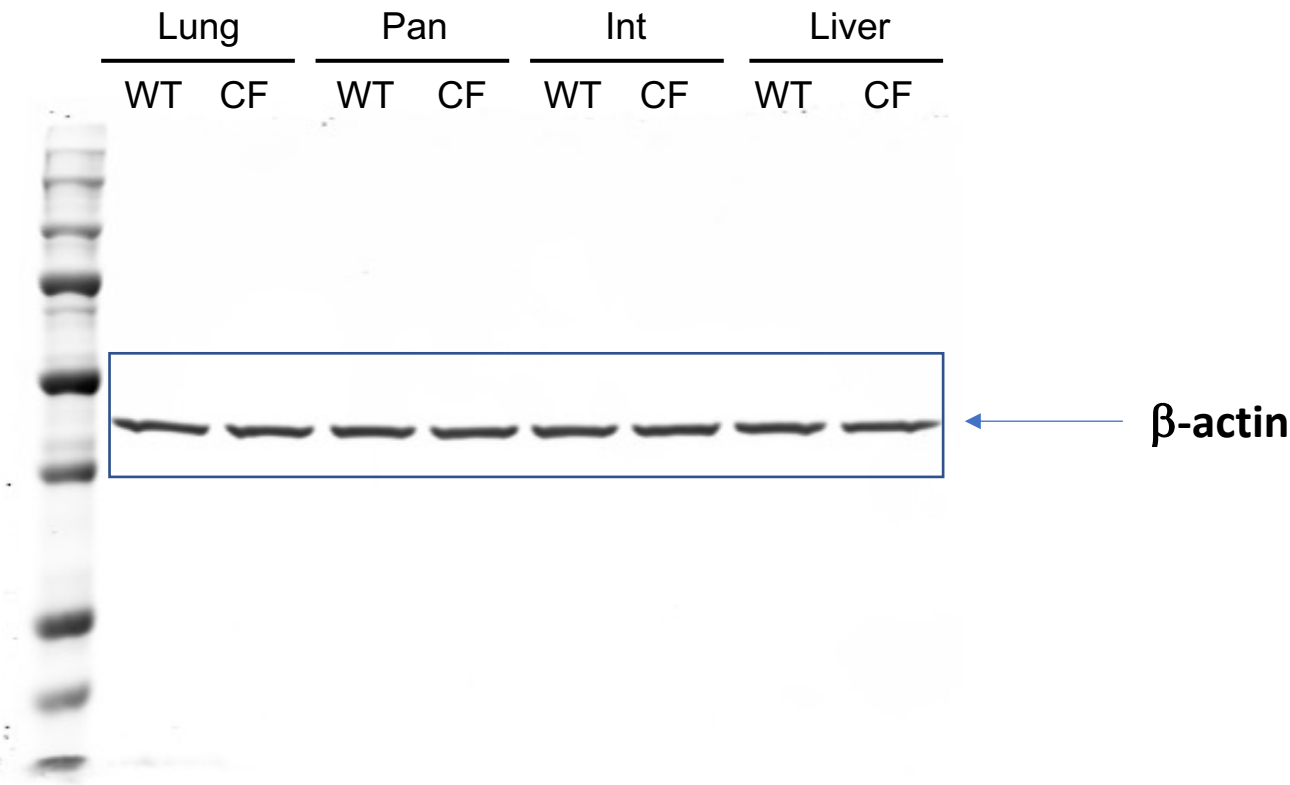

Full unedited gel for Supplementary Figure 1B

CFTR

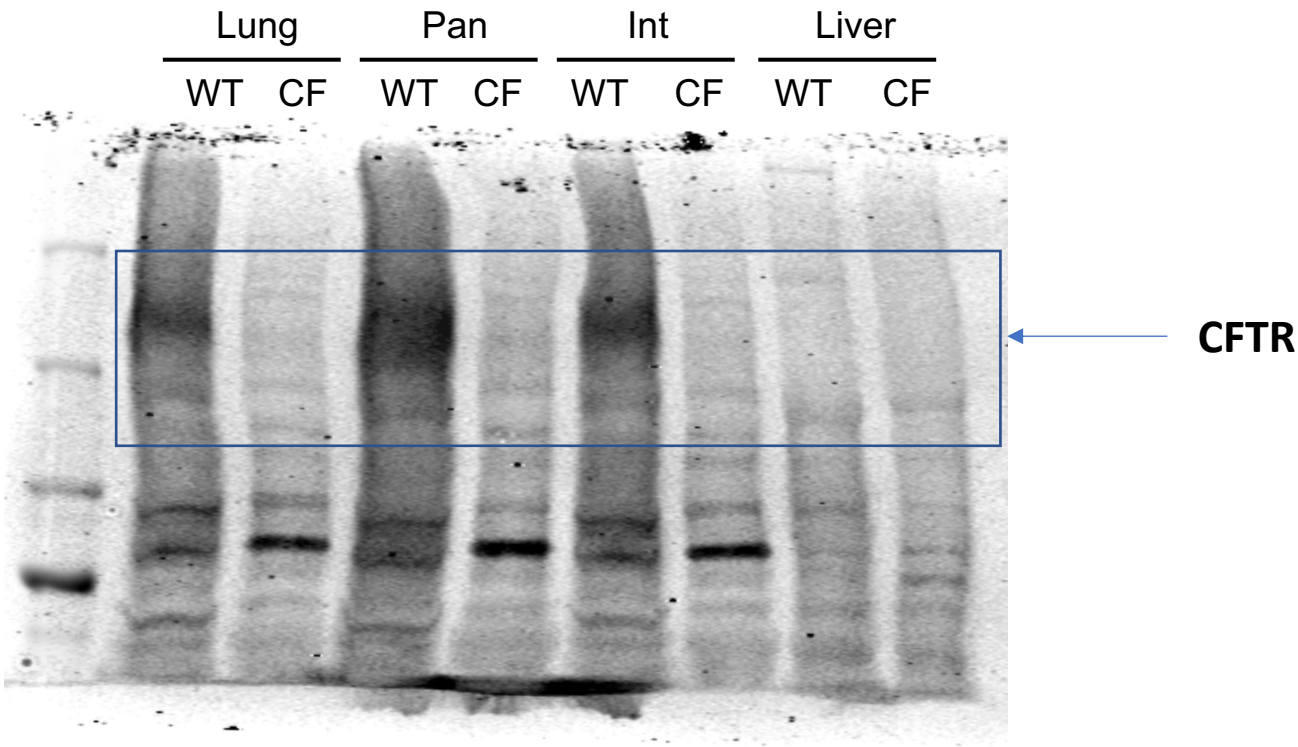

Full unedited gel for Supplementary Figure 7A

HRD1

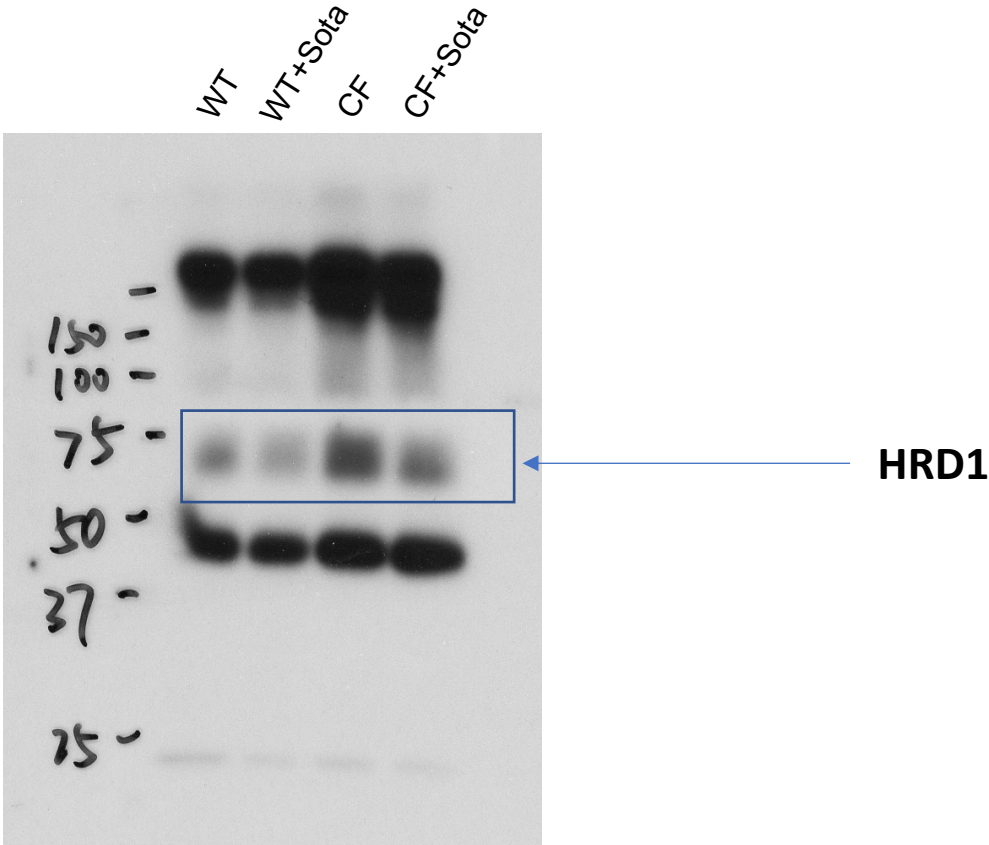



Full unedited gel for Supplementary Figure 7A

GAPDH

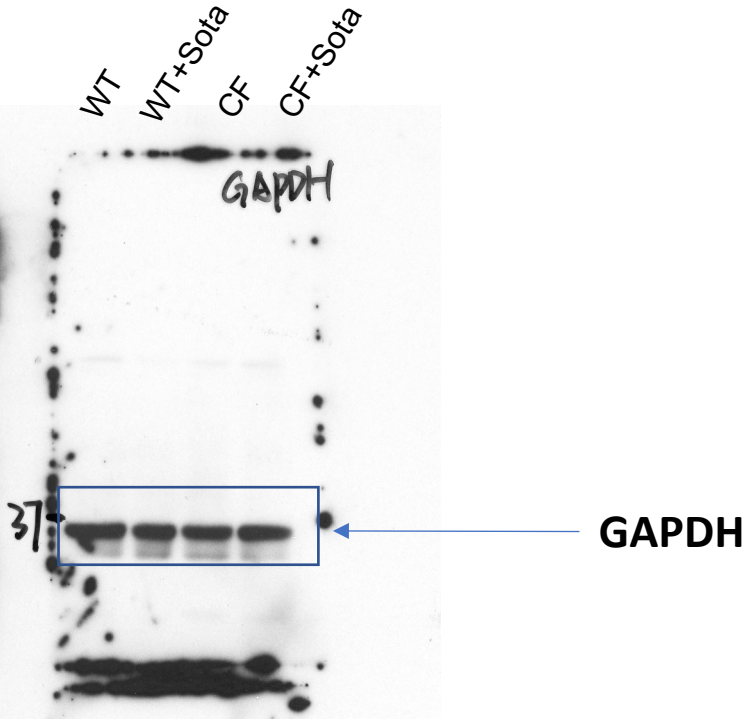

Full unedited gel for Supplementary Figure 9B

**SGLT1**

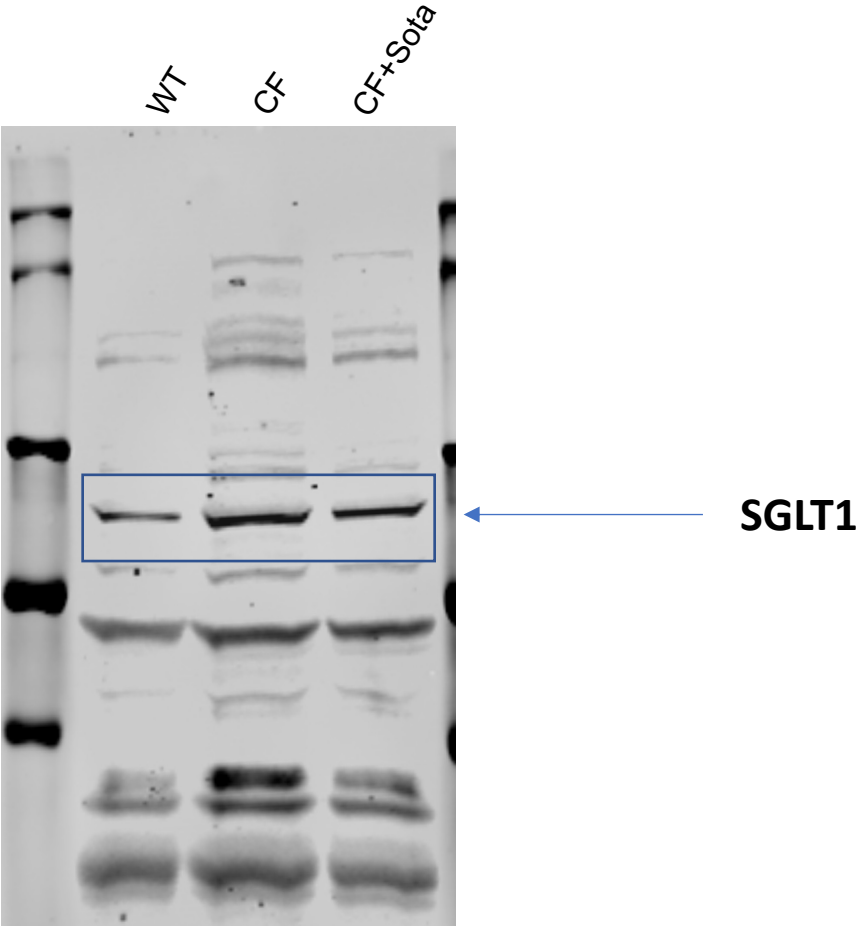

# Full unedited gel for Supplementary Figure 9B

## GRP78

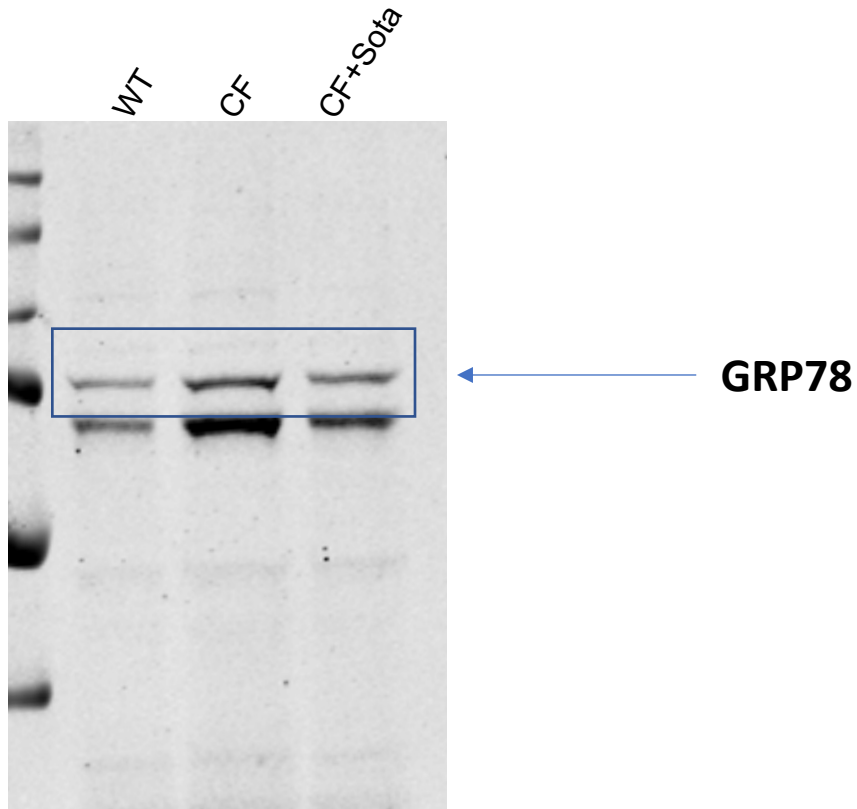

# Full unedited gel for Supplementary Figure 9B

**p-IRE1 $\alpha$**

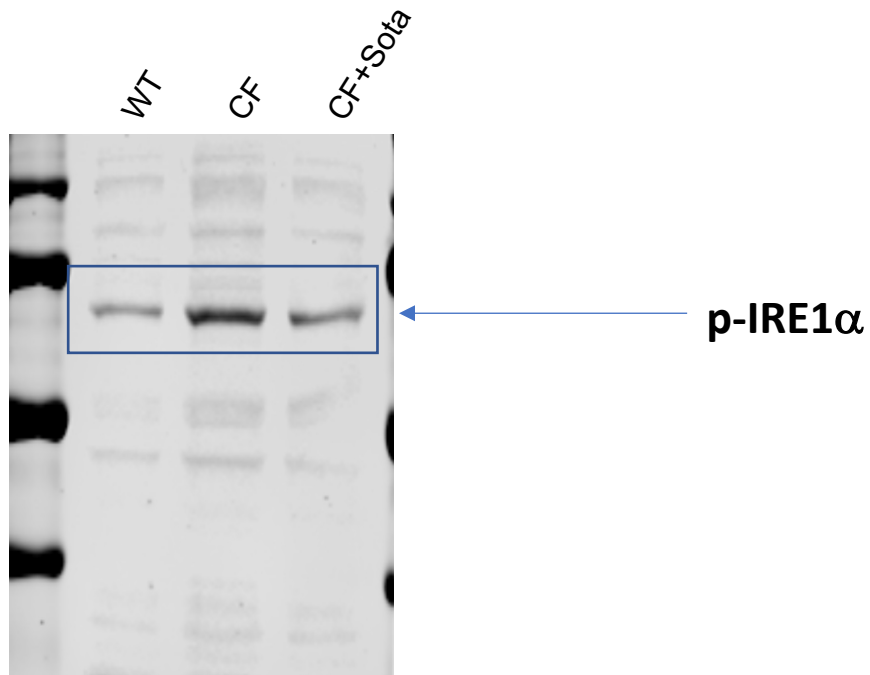

Full unedited gel for Supplementary Figure 9B

IRE1α

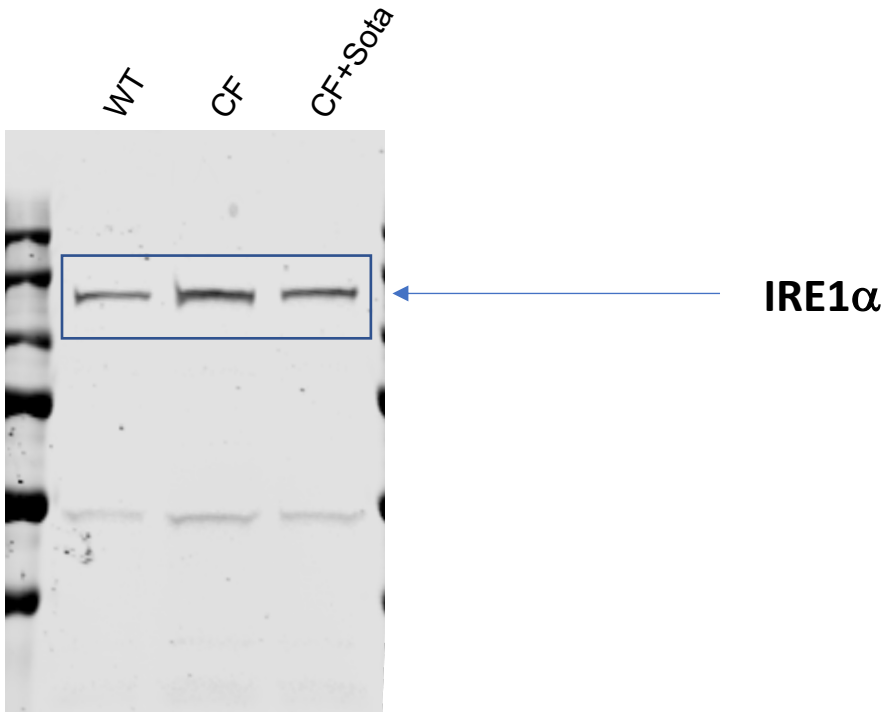

# Full unedited gel for Supplementary Figure 9B

## XBP1s

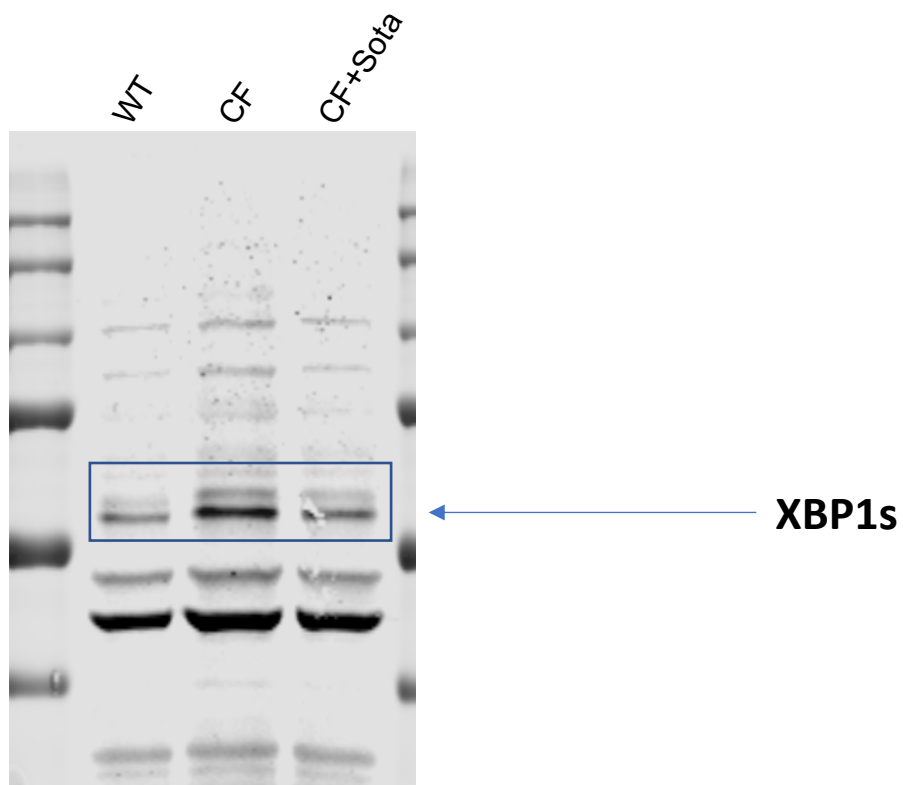

Full unedited gel for Supplementary Figure 9B

$\beta$ -actin

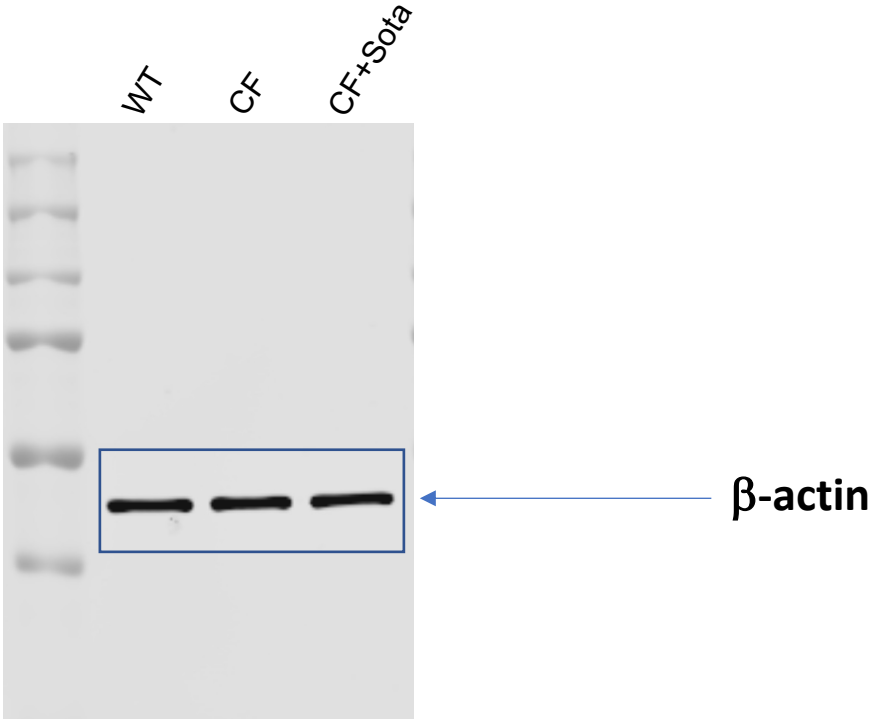

Full unedited gel for Supplementary Figure 10B

SGLT1

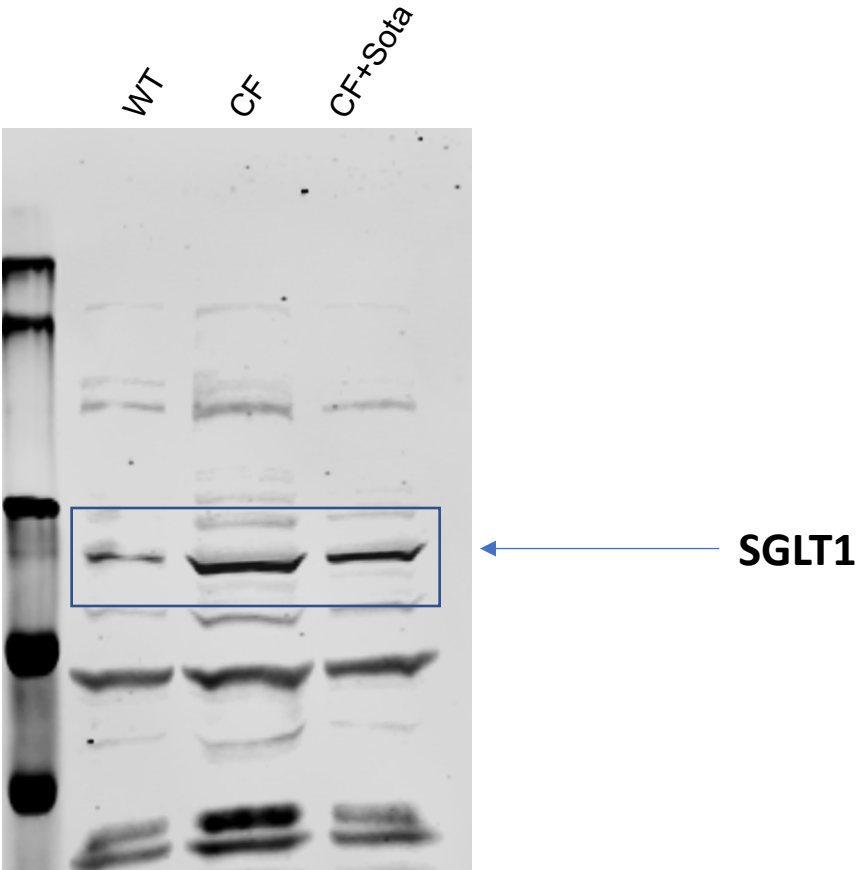



# Full unedited gel for Supplementary Figure 10B

## GRP78

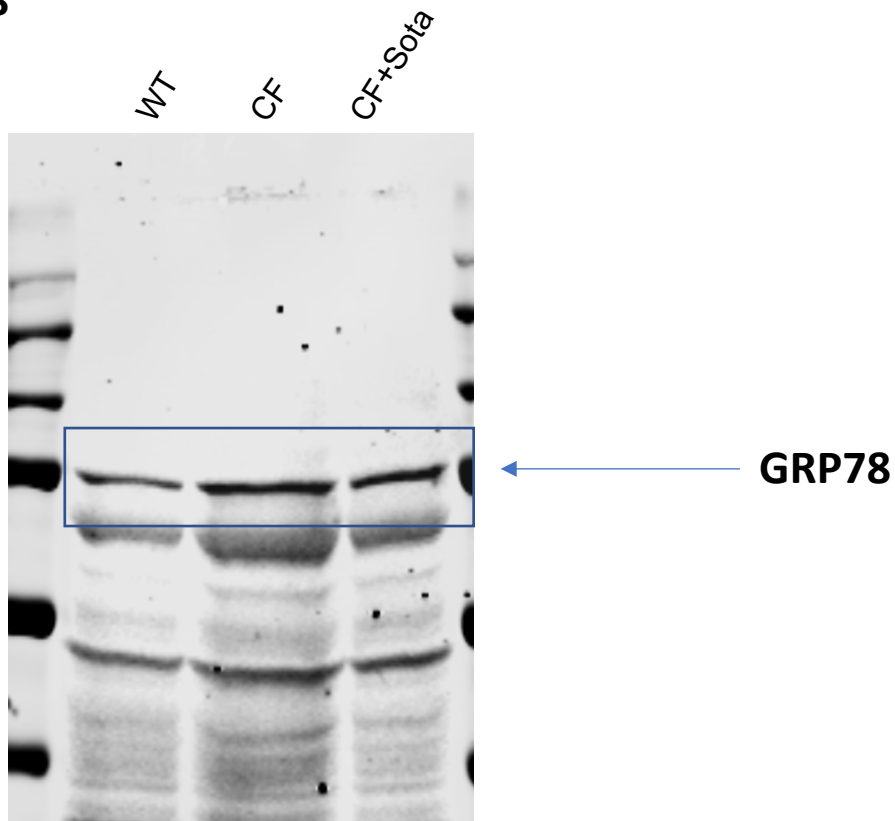

# Full unedited gel for Supplementary Figure 10B

**p-IRE1 $\alpha$**

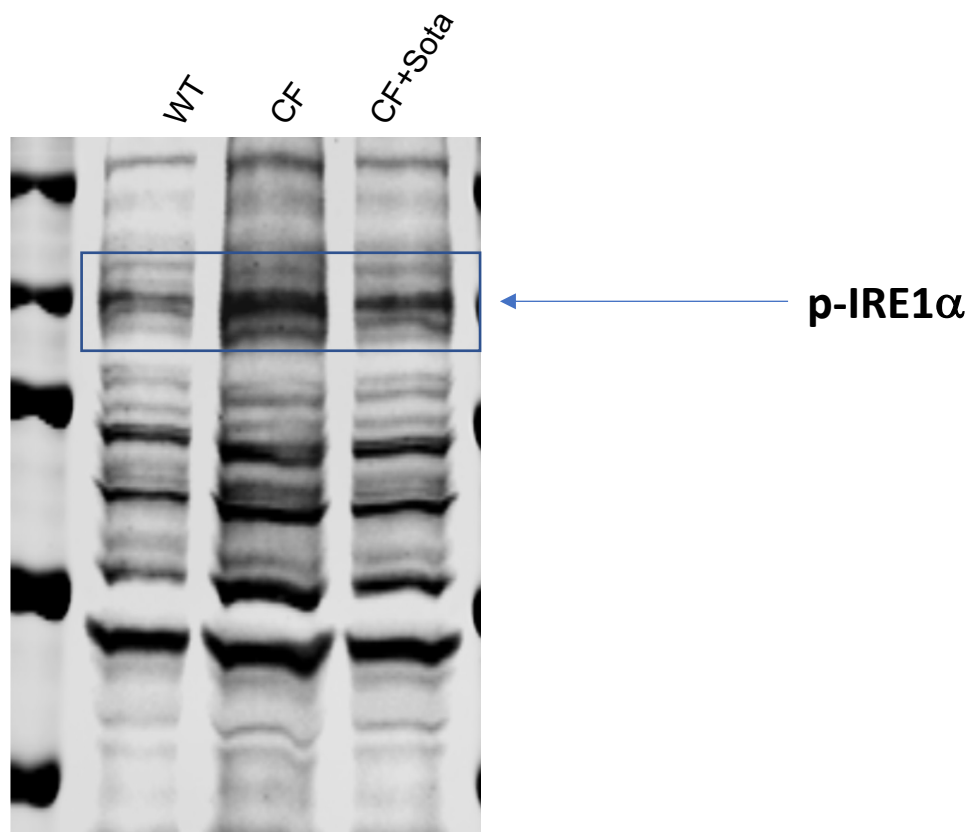

Full unedited gel for Supplementary Figure 10B

IRE1α

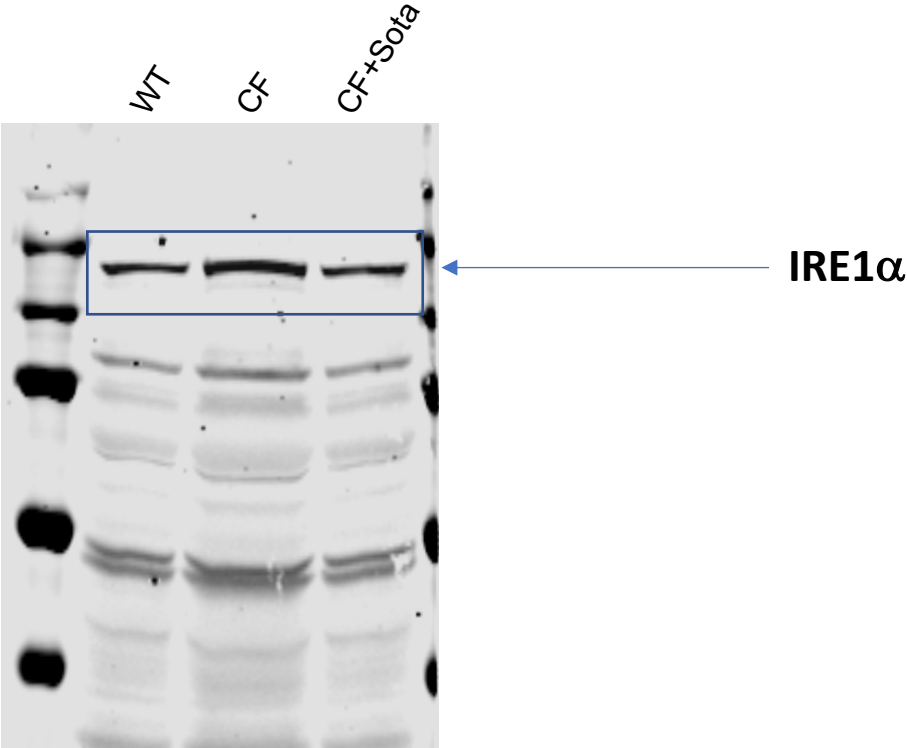

# Full unedited gel for Supplementary Figure 10B

## XBP1s

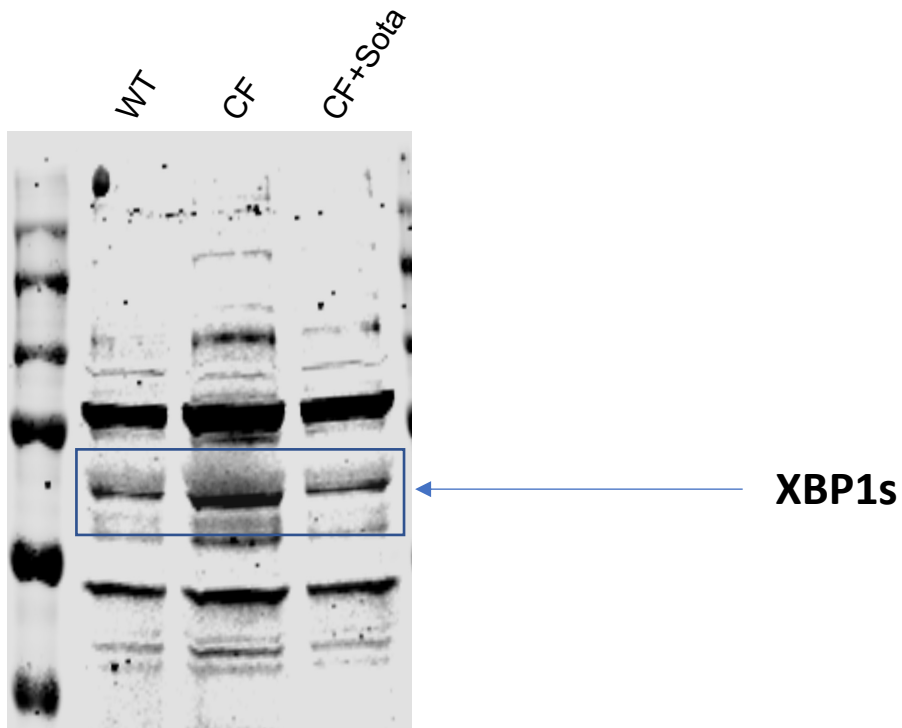

# Full unedited gel for Supplementary Figure 10B

$\beta$ -actin

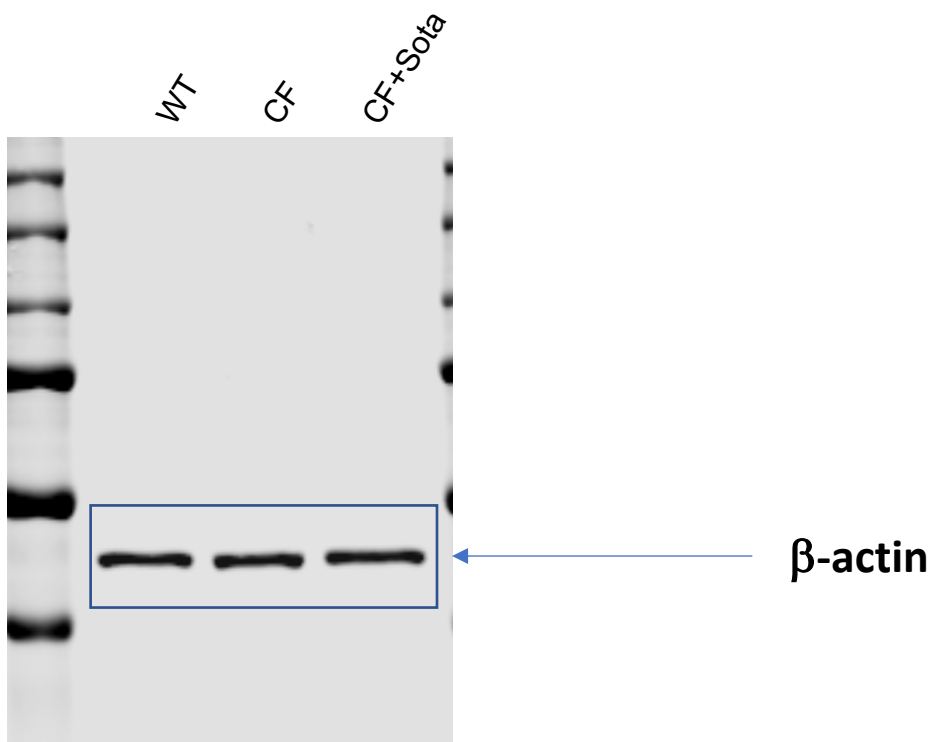

# Full unedited gel for Supplementary Figure 11B

## SGLT1

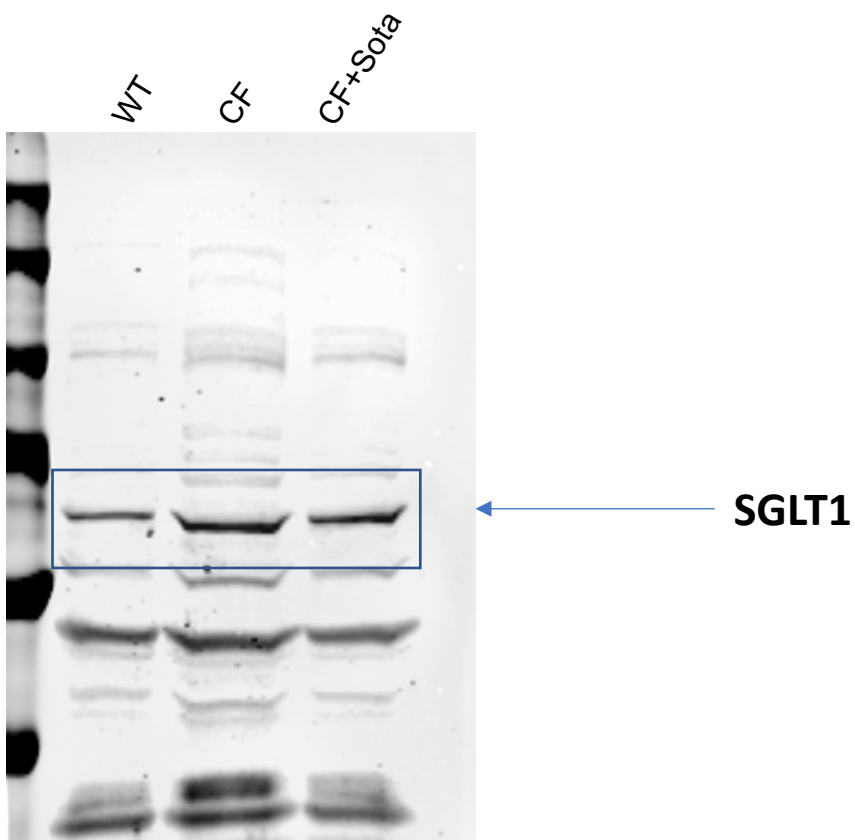

# Full unedited gel for Supplementary Figure 11B

## GRP78

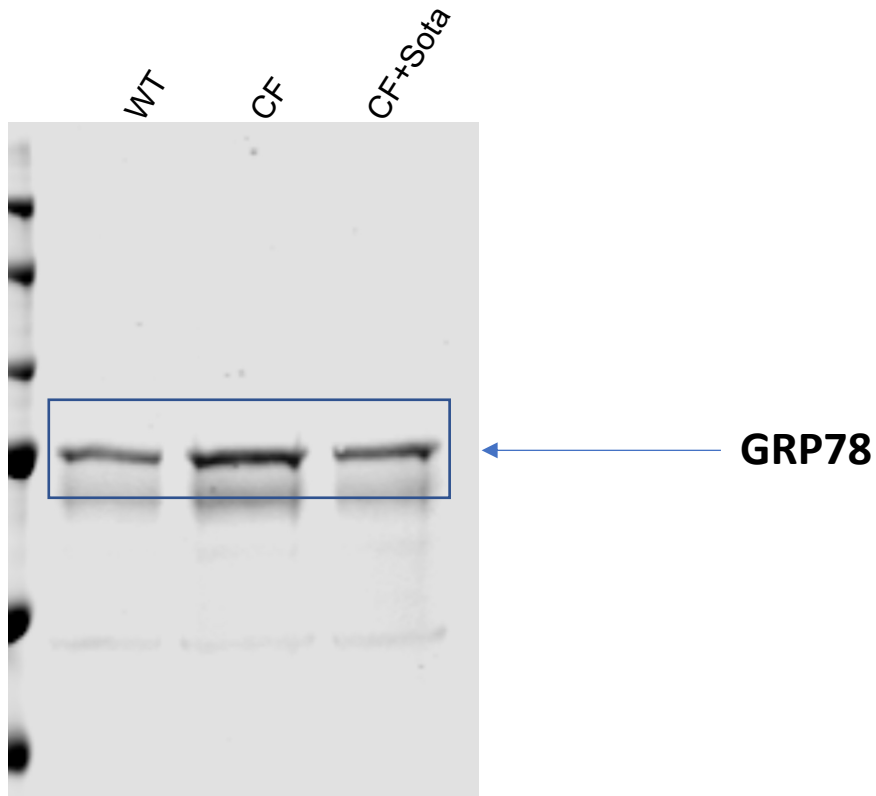

# Full unedited gel for Supplementary Figure 11B

**p-IRE1 $\alpha$**

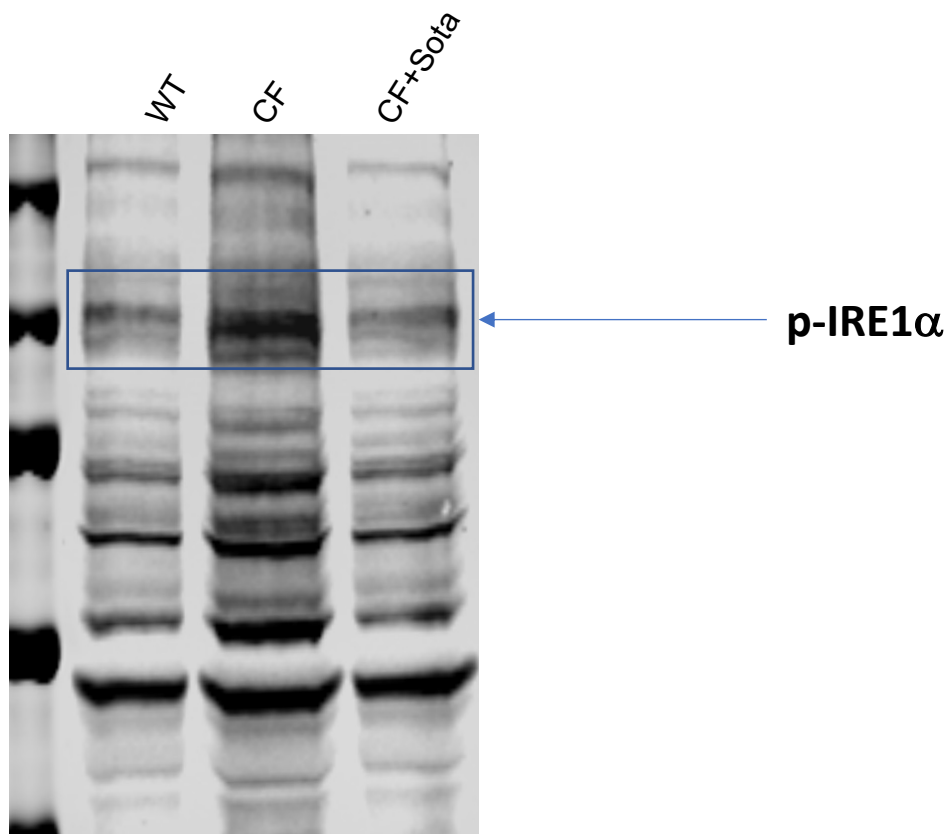



# Full unedited gel for Supplementary Figure 11B

**IRE1 $\alpha$**

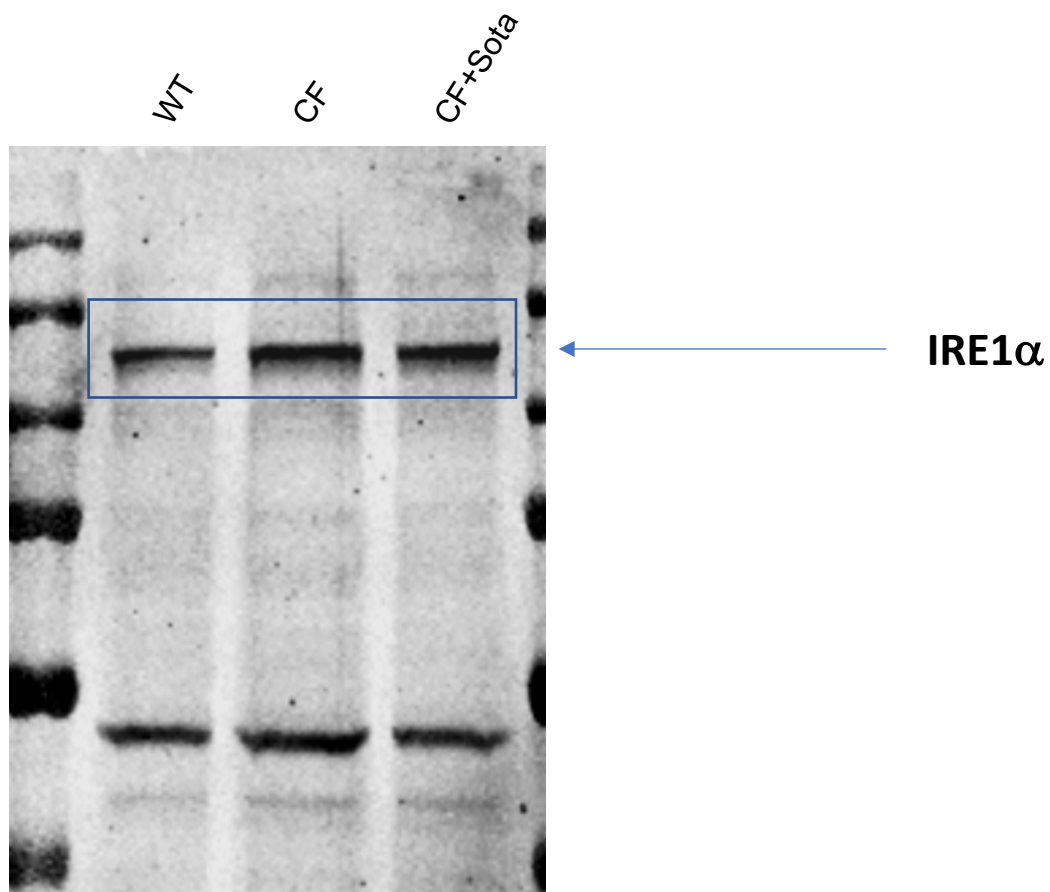

# Full unedited gel for Supplementary Figure 11B

## XBP1s

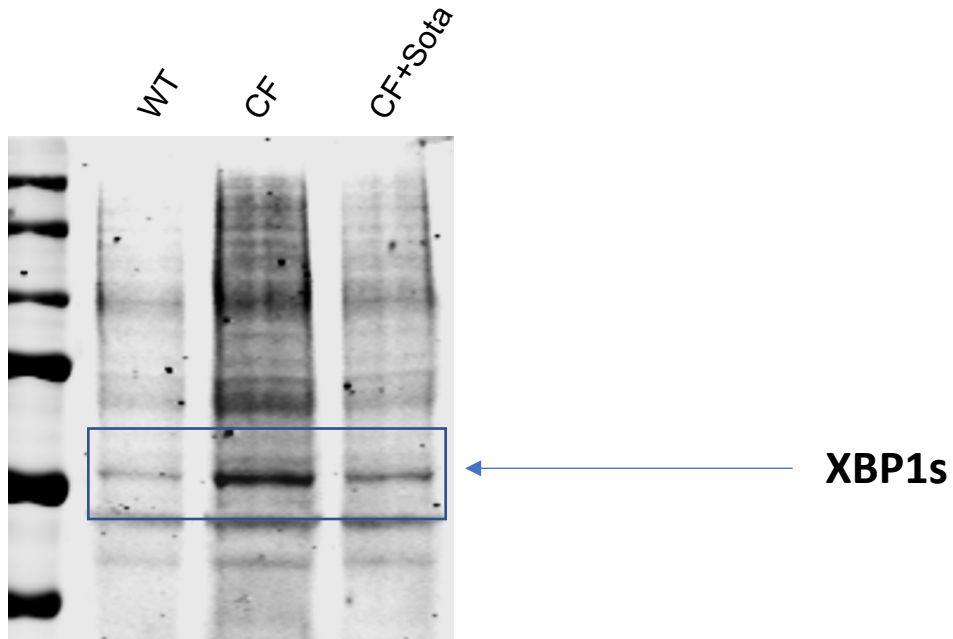

# Full unedited gel for Supplementary Figure 11B

$\beta$ -actin

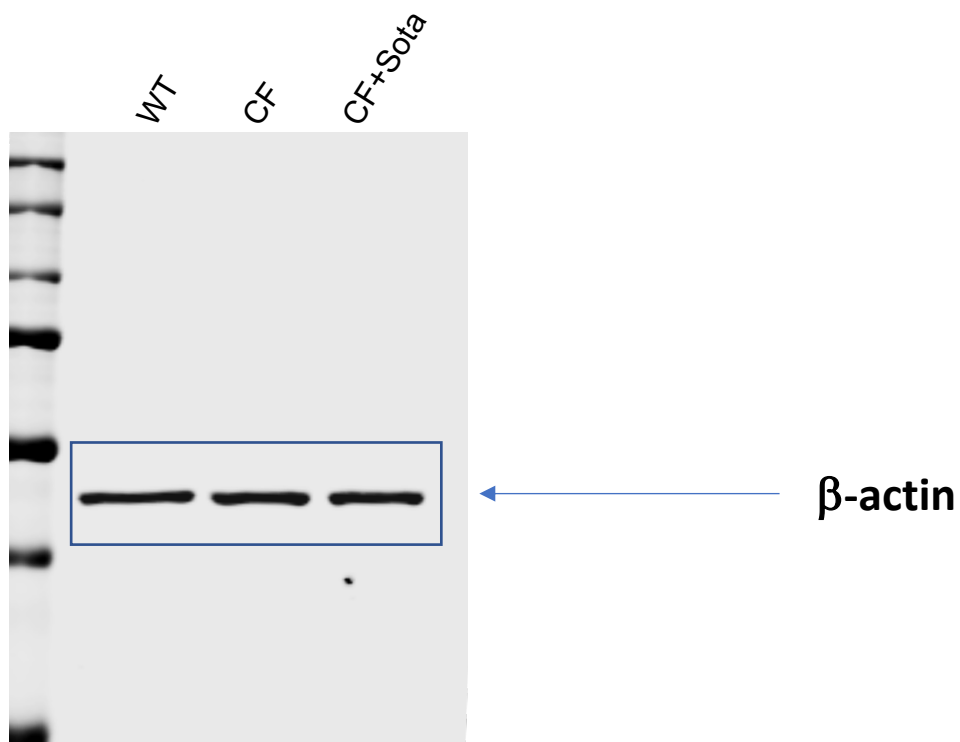

Supplement: sd2 [file 2]
